# Supplementary material for: Developing Personas of Gamers with Problematic Gaming Behavior among College Students Based on Qualitative Data of Gaming Motives and Push–Pull–Mooring
Source: MDPI journal article supplement (doi:10.3390/ijerph20010798), 2023-01-01
Supplement: s1 [file s1]

File S2. The four persona cases codes distributed

| Topic                                             | Theme                                              | category                        | Sub category                                | Code name                                                     | 4 persona cases |     |      |      |
|---------------------------------------------------|----------------------------------------------------|---------------------------------|---------------------------------------------|---------------------------------------------------------------|-----------------|-----|------|------|
|                                                   |                                                    |                                 |                                             |                                                               | I-1             | I-2 | II-1 | II-2 |
| high-risk<br>gamer's<br>push-<br>pull-<br>mooring | T1.<br>Gaming<br>motives<br>push-pull<br>effect    | C1. Advancement                 | C11. level upgrade                          | CO01. Seek walkthrough                                        | *               |     |      | *    |
|                                                   |                                                    |                                 |                                             | CO02. Pursue achievement                                      | *               | *   | *    | *    |
|                                                   |                                                    |                                 |                                             | CO03. Immerse in gaming                                       |                 |     |      | *    |
|                                                   |                                                    |                                 | C12. Gamer's routine                        | CO04. Spend money or time                                     | *               | *   |      |      |
|                                                   |                                                    |                                 |                                             | CO05. Prioritize gaming                                       |                 | *   | *    | *    |
|                                                   |                                                    |                                 |                                             | CO06. Reserve a large and constant play time                  | *               |     | *    | *    |
|                                                   |                                                    | C2. Socializing                 | C21. Socialization through<br>online gaming | CO07. Play games with acquaintances                           | *               |     | *    | *    |
|                                                   |                                                    |                                 |                                             | CO08. Play games with teammate through voice<br>chat software | *               |     |      | *    |
|                                                   |                                                    |                                 |                                             | CO09. Play games with friends at the Internet<br>café         |                 |     | *    | *    |
|                                                   |                                                    |                                 |                                             | CO10. Play games with roommates at dorm                       | *               | *   | *    |      |
|                                                   |                                                    |                                 |                                             | CO11. Play with strangers                                     |                 |     | *    | *    |
|                                                   |                                                    |                                 |                                             | CO12. Play games to have common topics to talk<br>about       | *               |     |      | *    |
|                                                   |                                                    |                                 | C22. Socialization through<br>SNS           | CO13. Spend long time on SNS                                  | *               | *   |      |      |
|                                                   |                                                    |                                 |                                             | CO14. Maintain the existing relationship                      | *               |     | *    |      |
|                                                   |                                                    |                                 |                                             | CO15. Have heart-to-heart talks with friends                  |                 |     |      | *    |
|                                                   |                                                    | C3. Escapism                    | C31. Reason for escaping                    | CO16. Run away                                                |                 |     | *    |      |
|                                                   |                                                    |                                 |                                             | CO17. Feel unsure about the future                            | *               | *   | *    | *    |
|                                                   |                                                    |                                 |                                             | CO18. Change game due to losing                               | *               | *   |      |      |
|                                                   |                                                    |                                 | C32. Action of escaping                     | CO19. Be away from keyboard                                   |                 | *   |      | *    |
|                                                   |                                                    |                                 |                                             | CO20. Be distracted while surfing the Net                     | *               | *   |      |      |
|                                                   |                                                    |                                 |                                             | CO21. Check with high frequency in a short time               | *               | *   | *    |      |
|                                                   | T2.<br>Gaming<br>consequences<br>mooring<br>effect | C4. Shift focus to<br>real-life |                                             | CO22. Aim to reduce gaming                                    | *               |     | *    | *    |
|                                                   |                                                    |                                 |                                             | CO23. Aim to reduce surfing the Net                           | *               |     | *    |      |
|                                                   |                                                    | C5. Symptoms of<br>addiction    |                                             | CO24. Lose control                                            | *               | *   |      | *    |
|                                                   |                                                    |                                 |                                             | CO25. Get negative consequences                               | *               |     | *    | *    |
|                                                   |                                                    |                                 |                                             | CO26. Self-aware of addiction                                 | *               | *   | *    |      |
